# Supplementary material for: Whitefly Genome Expression Reveals Host-Symbiont Interaction in Amino Acid Biosynthesis
Source: PLoS One. 2015 May 22;10(5):e0126751. doi: 10.1371/journal.pone.0126751 (PMC4441466; doi:10.1371/journal.pone.0126751)
Supplement: S3 Table — Top hit species distribution of B. tabaci unitigs against the NCBI nr protein database. (XLSX) [file pone.0126751.s005.xlsx]

## Sheet: Sheet1
	S3 Table . Top blast hit species. Top hit species distribution of B. tabaci unitigs against the NCBI nr protein database.
	Species	BLAST Top-Hits
	Acyrthosiphon pisum	2954
	Tribolium castaneum	1880
	Pediculus humanus	1509
	Nasonia vitripennis	887
	Megachile rotundata	637
	Camponotus floridanus	578
	Harpegnathos saltator	546
	Bombyx mori	425
	Dendroctonus ponderosae	422
	Bombus impatiens	379
	Bombus terrestris	356
	Acromyrmex echinatior	352
	Apis mellifera	350
	Aedes aegypti	343
	Danaus plexippus	335
	Solenopsis invicta	332
	Riptortus pedestris	311
	Apis florea	311
	Bemisia tabaci	274
	Candidatus Portiera	273
	Daphnia pulex	269
	Anopheles gambiae	241
	Culex quinquefasciatus	233
	Ceratitis capitata	171
	Drosophila melanogaster	164
	Drosophila willistoni	128
	Strongylocentrotus purpuratus	127
	Ixodes scapularis	123
	Anopheles darlingi	119
	others	6100
